# Supplementary material
Source: PubMed Central journal article supplement (PMC5712621)
Supplement: 10.1074_M117.816645_jbc.M117.816645-1.pdf [file 10.1074_M117.816645_jbc.M117.816645-1.pdf]

**Table S1. Data collection and refinement statistics.**

|                                       | <b>PDB ID: 5JL4</b>                         |
|---------------------------------------|---------------------------------------------|
| <b>Wavelength</b>                     |                                             |
| <b>Resolution range</b>               | 43.04 - 1.758 (1.821 - 1.758)               |
| <b>Space group</b>                    | P 1                                         |
| <b>Unit cell</b>                      | 45.192 45.346 49.04 63.957 68.045<br>62.434 |
| <b>Total reflections</b>              | 154054 (8489)                               |
| <b>Unique reflections</b>             | 29814 (2580)                                |
| <b>Multiplicity</b>                   | 5.2 (3.1)                                   |
| <b>Completeness (%)</b>               | 0.96 (0.90)                                 |
| <b>Mean I/sigma(I)</b>                | 36.27 (9.40)                                |
| <b>Wilson B-factor</b>                | 21.07                                       |
| <b>R-merge</b>                        | 0.05641 (0.1798)                            |
| <b>R-meas</b>                         | 0.06241 (0.2133)                            |
| <b>CC1/2</b>                          | 0.998 (0.961)                               |
| <b>CC*</b>                            | 1 (0.99)                                    |
| <b>Reflections used in refinement</b> | 28961 (2425)                                |
| <b>Reflections used for R-free</b>    | 1919 (159)                                  |
| <b>R-work</b>                         | 0.1591 (0.2143)                             |
| <b>R-free</b>                         | 0.1918 (0.2872)                             |
| <b>CC(work)</b>                       | 0.968 (0.918)                               |
| <b>CC(free)</b>                       | 0.957 (0.872)                               |

|                                     |       |
|-------------------------------------|-------|
| <b>Number of non-hydrogen atoms</b> | 2623  |
| <b>macromolecules</b>               | 2324  |
| <b>ligands</b>                      | 20    |
| <b>Protein residues</b>             | 294   |
| <b>RMS(bonds)</b>                   | 0.010 |
| <b>RMS(angles)</b>                  | 0.95  |
| <b>Ramachandran favored (%)</b>     | 99    |
| <b>Ramachandran allowed (%)</b>     | 0.67  |
| <b>Ramachandran outliers (%)</b>    | 0     |
| <b>Rotamer outliers (%)</b>         | 0.4   |
| <b>Clashscore</b>                   | 4.86  |
| <b>Average B-factor</b>             | 26.27 |
| <b>macromolecules</b>               | 24.92 |
| <b>ligands</b>                      | 56.60 |
| <b>solvent</b>                      | 35.34 |

Statistics for the highest-resolution shell are shown in parentheses.
